# Supplementary material
Source: Elsevier journal article supplement (https://www.sciencedirect.com/science/article/pii/S003493561830118X)
Supplement: mmc1 [file S003493561830118X:mmc1.docx]

**Definición de complicaciones**

1. Éxitus y Parada cardíaca
2. Hipertensión: Tas > 30% de la basal (tomada en consulta preanestésica o a la llegada del paciente) confirmada en dos tomas consecutivas y/o necesidad de tratamiento con hipotensores
3. Hipotensión: como una Tas <30% de la basal (tomada en consulta preanestésica o a la llegada del paciente) confirmada en dos tomas consecutivas, valor de tensión arterial sistólica menor de 90 mmHg y/o necesidad de tratamiento con vasopresores194,195
4. Bradicardia: como una FC < 50 lpm. En aquellos pacientes con frecuencia cardíaca basal por debajo de 60 se consideró bradicardia un descenso mayor del 20% de la frecuencia cardíaca basal.
5. Taquicardia: FC>100 lpm sin la administración de fármacos que incrementen la frecuencia cardíaca (por ejemplo, atropina).
6. Hipoxemia: SaO2 <90% de cualquier duración siempre que la curva de la pulsioximetría fuese morfológicamente estable y sin interferencias.
7. Dolor moderado severo: nivel 2 – 3 – 4 en la escala de dolor, medida por la escala de Keele188,189 (0, Sin dolor; 1, leve; 2, moderado; 3, severo; 4, insoportable).
8. Arritmias graves: alteraciones del ritmo cardíaco de nueva aparición tanto ventriculares como supraventriculares
9. Sangrado: salida de sangre en cantidad mayor de la esperada por boca o ano
10. Mareos: sensación subjetiva de inestabilidad asociado a la sedación. Es referido por el paciente.
11. Náuseas y vómitos.

**Valoración de la eficacia:**

| Sedación insuficiente: | No se puede continuar por mala tolerancia del paciente, ya sea tras haber alcanzado dosis máximas o no. |
| --- | --- |
| Alteración anatómica: | Cuando el endoscopista describe alguna alteración en la anatomía del colon que le impide progresar. |
| Síndrome adherencial: | Cuando aparecen distorsiones anatómicas derivadas de tracciones fibrosas, generalmente secundarias a cirugía |
| Diverticulosis: | Enfermedad diverticular del colon |
| Tumores: | Ya sean intra o extraluminales que impidan la exploración |
| Mala preparación: | Presencia de heces en colon que no permitan una visualización correcta |
| Inflamación vía digestiva: | Presencia de lesiones inflamatorias o hemorrágicas en la luz intestinal que empeoran con la progresión del endoscopio |
